# Supplementary material
Source: ML conference proceedings conference paper supplement (https://openaccess.thecvf.com/content/CVPR2022/html/Cao_RIO_Rotation-Equivariance_Supervised_CVPR_2022_paper.html)
Supplement: Supplementary file 1 [file Cao_RIO_Rotation-Equivariance_Supervised_CVPR_2022_supplemental.pdf]

# RIO: Rotation-equivariance supervised learning of robust inertial odometry

## Supplementary Material

Xiya Cao<sup>1\*</sup>    Caifa Zhou<sup>1</sup>    Dandan Zeng    Yongliang Wang  
Riemann lab, 2012 Laboratories, Huawei Technologies Co.Ltd

The supplementary materials provides details of the pseudo-code of adaptive TTT, the description of IPS dataset and additional results of RIO.

### 1. Pseudo-code of adaptive TTT

The pseudo-code of adaptive TTT is as follows:

#### Algorithm 1 Adaptive TTT

```

1: Initialize model  $F(\cdot|\theta)$  with pre-trained  $\theta^*$  as  $\theta_0$ 
2: Initialize ensemble models  $\{F(\cdot|\theta_i)\}_{i=1}^M$ 
3: for  $X_t$  arrive in a batch at time  $t$  do  $\triangleright 128$  samples
4:   Compute ensemble outputs  $\{\vec{v}_i^t = F(X_t|\theta_i)\}_{i=1}^M$ 
5:   Compute average output  $\vec{v}_*^t = \frac{1}{M} \sum_i \vec{v}_i^t$ 
6:   Compute variance  $\sigma_{v_t}^2 = \frac{1}{M} \sum_i (\vec{v}_i^t - \vec{v}_*^t)^2$ 
7:   if  $\min(\sigma_{v_t}^2) < 1e - 4$  then
8:     Restore model  $F(\cdot|\theta)$  with pre-trained  $\theta^*$  as  $\theta_t$ 
9:   else if  $\text{mean}(\sigma_{v_t}^2) < 0.04$  then
10:    Keep model parameters unchanged  $\theta_t = \theta_{t-1}$ 
11:   else
12:     for  $iter = 1$  to  $N_{TTT}$  do
13:       Select  $k$  angles  $\{\phi_i\}_{i=1}^k$ 
14:       Rotate  $X_t$  and get  $\{X_t^{\phi_i}\}_{i=1}^k$ 
15:        $\vec{v}_t = F(X_t|\theta_{t-1})$   $\triangleright$  original
16:       Rotate  $\vec{v}_t$  and get  $\{\vec{v}_t^{\phi_i}\}_{i=1}^k$ 
17:        $\{\vec{v}_t^{ci} = F(X_t^{\phi_i}|\theta_{t-1})\}_{i=1}^k$   $\triangleright$  conjugate
18:        $l_{ssl_t} = \sum_i \mathcal{L}(\vec{v}_t^{\phi_i}, \vec{v}_t^{ci})$   $\triangleright$  loss
19:       Update  $\theta$  using Adam
20:     end for
21:   end if
22:   Compute predictions  $\vec{v}_t = F(X_t|\theta_t)$ 
23: end for

```

### 2. IPS dataset

In order to evaluate the robustness of proposed inertial odometry against the type, placement, and handheld poses of mobile devices, we have collected 155 trajectories using

<sup>\*1</sup> denotes equal contribution.

Table 1. IPS database summary

| Scenarios         | Time(s) | Distance(m) | Count |
|-------------------|---------|-------------|-------|
| Reading portrait  | 1726    | 1637        | 9     |
| Reading landscape | 2531    | 2446        | 13    |
| Calling           | 1965    | 1818        | 10    |
| Bag               | 1742    | 1649        | 9     |
| Front pocket      | 1756    | 1687        | 9     |
| Back pocket       | 2088    | 2019        | 11    |
| Photo portrait    | 2090    | 2089        | 11    |
| Photo landscape   | 2397    | 2289        | 12    |
| Swing arm         | 1874    | 1848        | 10    |
| Combine scenes    | 13857   | 12166       | 61    |
| Total             | 32027   | 29648       | 155   |

a custom-developed application for logging the IMU measurements. The summary of IPS dataset is in Tab. 1. As for the ground truth, we use the dual foot-mounted IMU using AW70<sup>1</sup>. The synchronization between mobile device and foot-mounted IMU is via Bluetooth connection. The IMU data from the AW70 and from mobile device are logged on the mobile device side. So that all the timestamps are the same as the mobile device.

### 3. Results of uncertainty estimation

Trajectories from IPS, OXIOD and RIDI databases are relative short trajectories and do not have stationary status. However, uncertainty estimation still capture some error peaks as show in Fig. 1. Adaptive TTT strategy with the uncertainty estimation leads to small ATE over time.

### 4. Results of impact of size of training data and TTT iterations

We present influence of training data size and updating iterations on model performance with RoNIN, OXIOD and RIDI databases in Fig. 2. They yield consistent conclusion as with IPS database that i) *J-ResNet-TTT* with 30%

<sup>1</sup>Details about the AW70 can found in <https://consumer.huawei.com/levant/support/wearables/band3e/>.

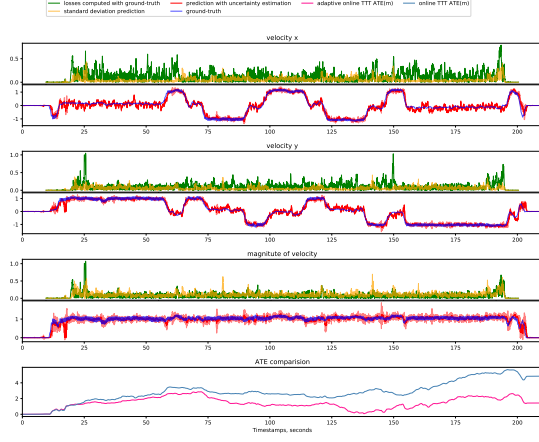

(a) Example uncertainty estimation on IPS

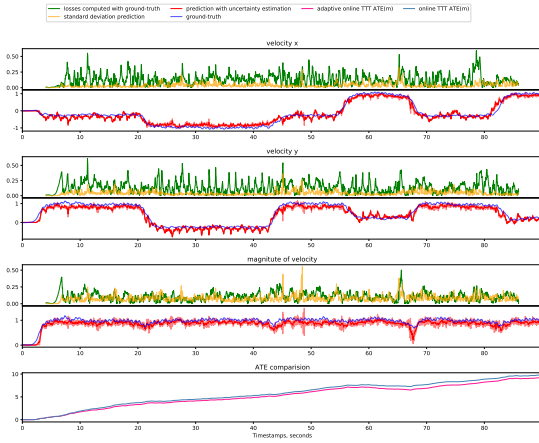

(b) Example uncertainty estimation on OXIOD

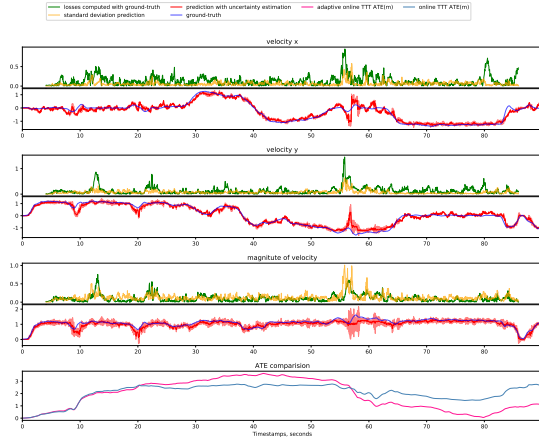

(c) Example uncertainty estimation on RIDI

Figure 1. Uncertainty estimations for RoNIN, OXIOD and RIDI Databases.

## 5. Visualization of trajectories

We select 9 trajectories from RoNIN, OXIOD and RIDI databases and visualize estimated results of the same model with or w/o the proposed TTT strategy in Fig. 3. It shows that for trajectory Fig. 3e that model already works well, the proposed TTT strategy leads to little improvement. It yields better performance for trajectories Fig. 3a, Fig. 3h, Fig. 3i. For trajectories Fig. 3b, Fig. 3c, Fig. 3d, Fig. 3f, Fig. 3g that model has not adapted to, TTT strategy improves a lot.

training database achieves on par performance with 100% B-ResNet, ii) more iterations result in model performance improvement when number of iterations less than 5.

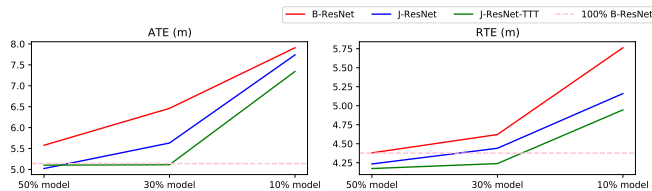

(a) Impact of the number of TTT iterations on ATE and RTE on RoNIN

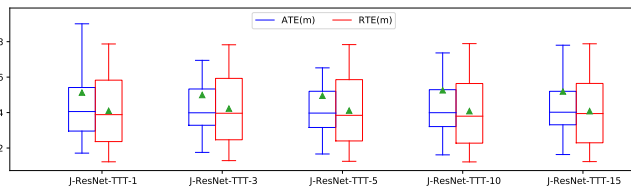

(b) Impact of the number of TTT iterations on ATE and RTE on RoNIN

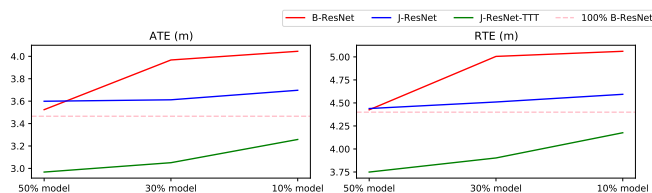

(c) Impact of the number of TTT iterations on ATE and RTE on OXIOD

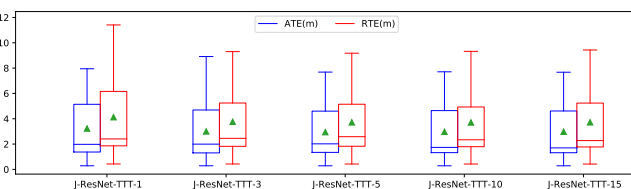

(d) Impact of the number of TTT iterations on ATE and RTE on OXIOD

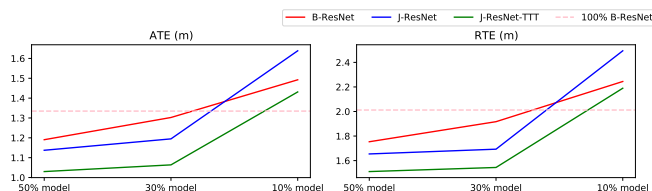

(e) Impact of the number of TTT iterations on ATE and RTE on RIDI

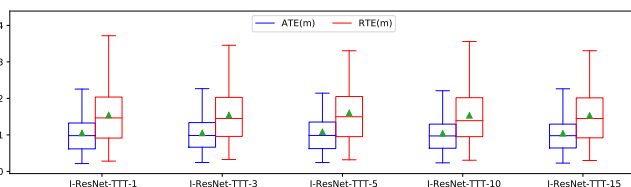

(f) Impact of the number of TTT iterations on ATE and RTE on RIDI

Figure 2. Summary of the size of training data and TTT iterations on various datasets

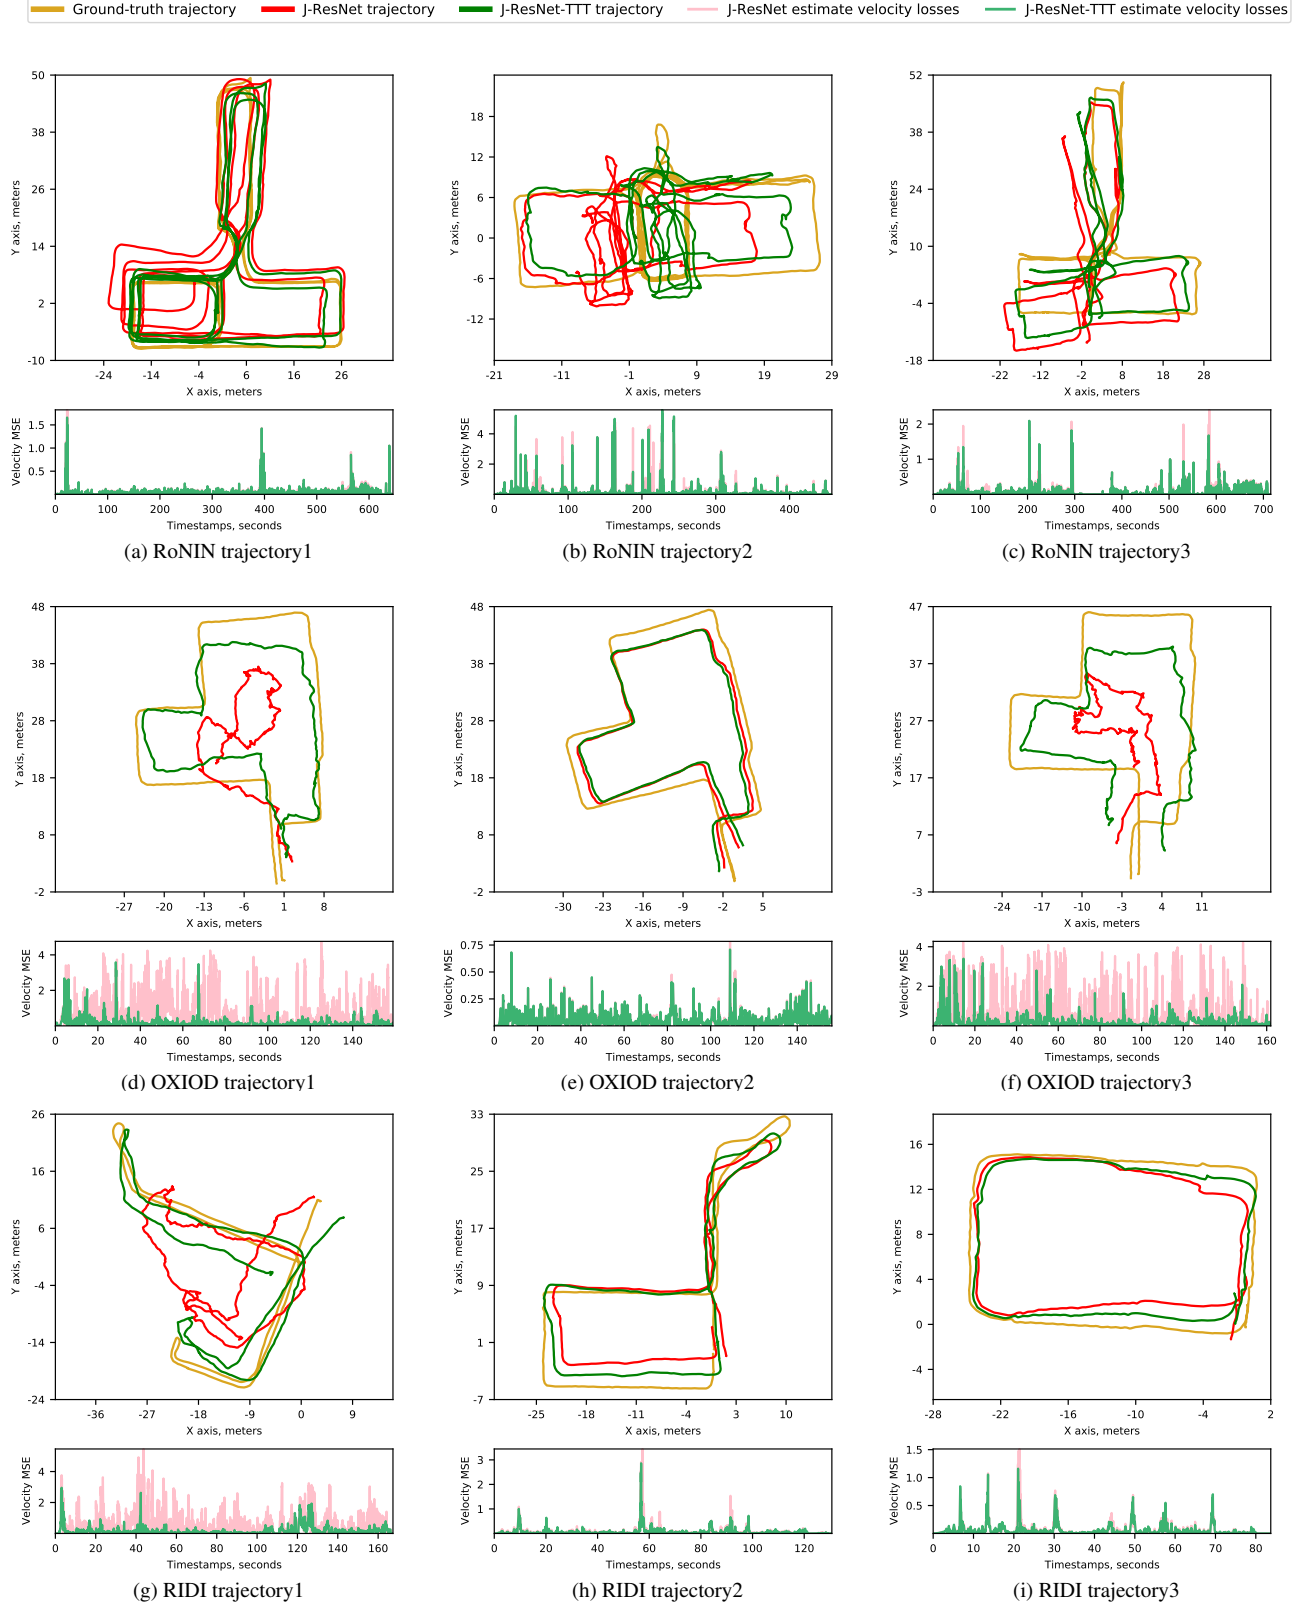

Figure 3. Selected visualizations. We select 3 examples from each open sourced dataset and visualize trajectories of ground-truth, J-ResNet and J-ResNet-TTT, along with velocity losses comparison of J-ResNet and J-ResNet-TTT.
